# Supplementary material for: Race and Socioeconomic Status Independently Affect Risk of Major Amputation in Peripheral Artery Disease
Source: PubMed Central journal article supplement — J Am Heart Assoc. 2018 Jan 12;7(2):e007425. doi: 10.1161/JAHA.117.007425 (PMC5850162; doi:10.1161/jaha.117.007425), 2018-01-12
Supplement: JAH3-7-e007425-s001.pdf [file JAH3-7-e007425-s001.pdf]

# **SUPPLEMENTAL MATERIAL**

**Table S1. Components of Area Deprivation index.**

The ADI is a validated, weighted factor-based index which uses 17 markers of socioeconomic status including poverty, education, housing and employment indicators drawn from US Census data to create a measure of socioeconomic context for a particular census-based unit (data derived from Singh et al, *American journal of public health*. 2003;93:1137-1143).

|                                                                                                                                                                                          |
|------------------------------------------------------------------------------------------------------------------------------------------------------------------------------------------|
| Percent of population aged $\geq 25$ years with $< 9$ years of education                                                                                                                 |
| Percent of population aged $\geq 25$ years with $<$ a high school diploma                                                                                                                |
| Percent of employed persons $\geq 16$ years of age in white-collar occupations                                                                                                           |
| Median family income                                                                                                                                                                     |
| Income disparity (Defined by Singh as the log of 100 * the ratio of the number of households with $< \$10,000$ in income to the number of households with $\$50,000$ or more in income.) |
| Median home value                                                                                                                                                                        |
| Median gross rent                                                                                                                                                                        |
| Median monthly mortgage                                                                                                                                                                  |
| Percent owner-occupied housing units (home ownership rate)                                                                                                                               |
| Percent of civilian labor force population $\geq 16$ years of age unemployed (unemployment rate)                                                                                         |
| Percent of families below the poverty level                                                                                                                                              |
| Percent of population below 150% of the poverty threshold                                                                                                                                |
| Percent of single-parent households with children $< 18$ years of age                                                                                                                    |
| Percent of households without a motor vehicle                                                                                                                                            |
| Percent of households without a telephone                                                                                                                                                |
| Percent of occupied housing units without complete plumbing                                                                                                                              |
| Percent of households with more than one person per room (crowding).                                                                                                                     |

We estimated ADI at a 5 digit ZCTA by averaging the 9 digit ADI estimations for each zip code.

We used the methodology described by Kind et al (*Annals of internal medicine*. 2014;161:765-774) and using datasets from the Health Innovation Program. Area Deprivation Index. UW Health Innovation Program; 2014. Available at: <http://www.hipxchange.org/ADI>.

**Table S2. ICD-9 diagnosis and CPT codes used to define comorbidities and amputations.**

| <b>Comorbid condition</b>                                    | <b>Codes used</b>                                                                                                                                                                                                                                                                                                                                                                             |
|--------------------------------------------------------------|-----------------------------------------------------------------------------------------------------------------------------------------------------------------------------------------------------------------------------------------------------------------------------------------------------------------------------------------------------------------------------------------------|
| Depression                                                   | ICD9 diagnosis codes: 293.83, 296.0, 296.21, 296.22, 296.23, 296.24, 296.25, 296.26, 296.30, 296.31, 296.32, 296.33, 296.34, 296.35, 296.36, 300.4, 311                                                                                                                                                                                                                                       |
| Hypertension                                                 | ICD9 diagnosis codes: 401.0 - 406                                                                                                                                                                                                                                                                                                                                                             |
| Coronary Artery Disease (CAD)                                | ICD9 diagnosis codes: 410.0 or 414.9<br>ICD9 ProcedureCode:36.xx                                                                                                                                                                                                                                                                                                                              |
| Atrial Fibrillation                                          | ICD9 diagnosis codes: 427.31 or 427.32                                                                                                                                                                                                                                                                                                                                                        |
| Carotid artery stenosis                                      | ICD9 diagnosis codes: 433.00 - 433.91,433.1, 433.10, 433.3, 433.30, 433.11, 433.31, 433.9 ,433.90, 433.91, 435.8 ,435.9, 784.94, 368.12, 434.91 ,436 ,342, 368.11, 368.44, 362.84, 435 ,437, 443.21, 900.01, 781.4, V12.54, 784.5 ,780.4, 780.2 ,368.9, 781.3, 447.1, 447.9, V72.81,v72.83, v72.84, 362.xx<br><br>ICD9 Procedure Code: 00.63,38.12<br>CPT Code: 37215,37216,37217,0075T,35301 |
| Congestive Heart Failure (CHF)                               | ICD9 diagnosis codes: 428.0 - 428.9                                                                                                                                                                                                                                                                                                                                                           |
| Chronic Obstructive Pulmonary Disease (COPD)                 | ICD9 diagnosis codes: 490,491.0, 491.1, 491.2, 491.20, 491.21, 491.22, 491.8, 491.9, 492.0, 492.8, 494, 494.0, 494.1, 496, 493.00, 493.01, 493.02, 493.10, 493.11, 493.12, 493.20, 493.21, 493.22, 493.81, 493.82, 494.90, 493.90, 493.92                                                                                                                                                     |
| Chronic Kidney Disease/End Stage Renal Disease (CKD/ESRD)    | ICD9 diagnosis codes: 403.01, 403.11, 403.91, 404.02, 404.03, 404.12, 404.12, 404.13, 404.92, 404.93,585.5,585.6, V45.11, V45.12, V56.0, V56.1, V56.2, V56.32, V56.9,996.73<br><br>ICD9 Procedure Code: 38.95                                                                                                                                                                                 |
| Amputation                                                   | ICD9 Procedure Code: 84.10, 84.14, 84.15,84.16, 84.17, 84.18, 84.19<br>CPT Code: 27290, 27295, 27590, 27591,27592,27598, 27880, 27881,27882                                                                                                                                                                                                                                                   |
| Critical limb ischemia (additional codes besides PAD coding) | ICD9 diagnosis codes: 040.0, 785.4, 730.07, 730.17, 730.27, 730.97, 707.14, 707.15, 707.1, 680.7, 682.7, 681.10, 681.11<br>CPT codes: 11044, 10060, 10061, 20000, 20005                                                                                                                                                                                                                       |

**Table S3. Comparison of missing and non-missing demographics. Stratified by no vs. any missing data, and observations included in and excluded from each Cox proportional hazards models due to missing data.**

| <u>Variable</u>                                                               | <u>All</u>           | <u>Included in<br/>Cox models</u> | <u>Excluded<br/>from Cox<br/>models<br/>(missing<br/>covariates)*</u> |
|-------------------------------------------------------------------------------|----------------------|-----------------------------------|-----------------------------------------------------------------------|
| N                                                                             | 155,647              | 129,157                           | 26,490                                                                |
| <i>Race [Missing= 11,872 (7.6%)]</i>                                          |                      |                                   |                                                                       |
| White                                                                         | 82.6                 | 82.53                             | 83.21                                                                 |
| Black                                                                         | 16.14                | 16.24                             | 15.25                                                                 |
| Other                                                                         | 1.26                 | 1.23                              | 1.55                                                                  |
| <i>Median Household Income of Residential ZCTA<br/>[Missing= 3637 (2.3%)]</i> |                      |                                   |                                                                       |
| <=\$40,000                                                                    | 30.85                | 30.99                             | 30.06                                                                 |
| > \$40,000                                                                    | 69.15                | 69.01                             | 69.93                                                                 |
| <i>Urban vs. Rural ZCTA, %[(Missing= 3208<br/>(2.1%)]</i>                     |                      |                                   |                                                                       |
| Urban Area (pop. > 50K)                                                       | 67.27                | 67.66                             | 65.12                                                                 |
| Urban Cluster (pop. <=50K)                                                    | 20.1                 | 19.9                              | 21.18                                                                 |
| Rural                                                                         | 12.63                | 12.44                             | 13.7                                                                  |
| <i>Age (y) [Missing= 11(0.01% )]</i>                                          | 66.66 (9.85)         | 66.41 (9.74)                      | 67.89<br>(10.27)                                                      |
| <i>Sex (% Male) [Missing= 11(0.01% )]</i>                                     | 97.92                | 97.93                             | 97.88                                                                 |
| <i>Smoking</i>                                                                |                      |                                   |                                                                       |
| Current                                                                       | 51.38                | 52.48                             | 46.01                                                                 |
| Former                                                                        | 19.01                | 19.21                             | 18.08                                                                 |
| Never                                                                         | 6.46                 | 6.36                              | 6.95                                                                  |
| Missing                                                                       | 23.15                | 21.96                             | 28.96                                                                 |
| <i>BMI, kg/m2 [Missing= 9514 (6.1% )]</i>                                     |                      |                                   |                                                                       |
| Underweight (<18.5)                                                           | 2.29                 | 2.29                              | 2.25                                                                  |
| Normal Weight, 18.5-24.9                                                      | 26.25                | 26.08                             | 27.52                                                                 |
| Overweight (25.0-29.9)                                                        | 36.02                | 35.93                             | 36.74                                                                 |
| Obese (30.0+)                                                                 | 35.44                | 35.7                              | 33.49                                                                 |
| <i>Serum Creatinine [Missing= 3613 (2.3% )]</i>                               | 1.10 (0.90-<br>1.40) | 1.10 (0.90-<br>1.40)              | 1.10 (0.90-<br>1.40)                                                  |
| <i>Comorbidities [Missing= 0 (0% )]</i>                                       |                      |                                   |                                                                       |
| Diabetes                                                                      | 45.52                | 46.1                              | 42.68                                                                 |
| Hypertension                                                                  | 84.22                | 85.02                             | 80.28                                                                 |

|                                          |       |       |       |
|------------------------------------------|-------|-------|-------|
| CAD                                      | 46.25 | 47.1  | 42.13 |
| CHF                                      | 16.4  | 16.87 | 14.12 |
| COPD                                     | 8.53  | 8.82  | 7.09  |
| AF                                       | 12.01 | 12.26 | 10.8  |
| Carotid Disease                          | 63.79 | 65.07 | 57.55 |
| Depression                               | 15.99 | 16.52 | 13.41 |
| CKD or ESRD                              | 7.37  | 7.6   | 6.25  |
| <i>PAD severity, % [Missing=0 (0% )]</i> |       |       |       |
| Unspecified (per ICD-9 codes)            | 68.54 | 68.39 | 69.25 |
| Claudication                             | 20.2  | 20.1  | 20.66 |
| Critical Limb Ischemia                   | 11.26 | 11.51 | 10.08 |

Abbreviations: PAD, Peripheral Artery Disease; VHA, Veterans Health Administration; SD, standard deviation; IQR, interquartile range; BMI, body mass index; CAD, coronary artery disease; CHF, congestive heart failure; COPD, chronic obstructive pulmonary disease; AF, atrial fibrillation; CKD, chronic kidney disease; ESRD, end stage renal disease; mg, milligram; dL, deciliter.

\*p for comparisons across Cox inclusion/exclusion <0.0001 for all variables except income, and poverty (p<0.05); and creatinine and sex (p>0.05)

**Table S4. Cause specific Cox proportional hazard models for impact of race and socioeconomic status on amputations: (1) Fully adjusted primary model, (2) Fully adjusted model without medications and (3) Fully adjusted model using CKD as defined by eGFR**

|                                                      | <b>Model 1</b>                     | <b>Model 2</b>                                         | <b>Model 3</b>                                       |
|------------------------------------------------------|------------------------------------|--------------------------------------------------------|------------------------------------------------------|
| <b><u>Variable</u></b>                               | <b><u>Fully adjusted model</u></b> | <b><u>Fully adjusted model without medications</u></b> | <b><u>Fully adjusted model using CKD by eGFR</u></b> |
| <i>Race</i>                                          |                                    |                                                        |                                                      |
| White                                                | Ref.                               | Ref                                                    | Ref.                                                 |
| Black                                                | 1.37 (1.30, 1.45)                  | 1.41(1.34, 1.49)                                       | 1.38 (1.30 , 1.45)                                   |
| <i>Median Income (Household) of Residential ZCTA</i> |                                    |                                                        |                                                      |
| \$40,001+                                            | Ref.                               | Ref                                                    | Ref                                                  |
| <=\$40,000                                           | 1.12 (1.06, 1.17)                  | 1.12 (1.07, 1.17)                                      | 1.12 (1.06 , 1.17)                                   |
| Age (1-year increase)                                | 0.99, 0.98, 0.99)                  | 0.99 (0.98, 0.99)                                      | 0.99 (0.99 , 0.99)                                   |
| <i>Sex</i>                                           |                                    |                                                        |                                                      |
| Male                                                 | Ref.                               | Ref                                                    | Ref.                                                 |
| Female                                               | 0.46 (0.37 , 0.57)                 | 0.46 (0.36, 0.57)                                      | 0.46 (0.37 , 0.57)                                   |
| Diabetes                                             | 1.64 (1.49, 1.82)                  | 1.90 (1.10, 1.28)                                      | 1.65 (1.50 , 1.82)                                   |
| CKD or ESRD                                          | 1.59 (1.46, 1.73)                  | 1.67 (1.54, 1.83)                                      | -                                                    |
| <i>PAD Severity</i>                                  |                                    |                                                        |                                                      |
| Claudication                                         | Ref.                               | Ref                                                    | Ref                                                  |
| Unspecified (per ICD-9 codes)                        | 0.88 (0.80, 0.96)                  | 0.90 (0.83 - 0.98)                                     | 0.88 (0.80 , 0.96)                                   |
| Critical Limb Ischemia                               | 6.43 (5.92, 6.98)                  | 6.99 (6.45, 7.59)                                      | 6.41 (5.91 , 6.96)                                   |
| <i>Urban</i>                                         |                                    |                                                        |                                                      |
| Urban Area, pop. > 50k                               | Ref.                               | Ref                                                    | Ref.                                                 |
| Urban Cluster, pop. 2.5k-50k                         | 0.99 (0.93, 1.05)                  | 0.98 (0.93, 1.04)                                      | 0.93 (0.86 , 1.00)                                   |
| Rural                                                | 0.93 (0.87, 1.01)                  | 0.93 (0.86, 1.00)                                      | 0.99 (0.93 , 1.05)                                   |
| <i>Comorbidities (ref: no)</i>                       |                                    |                                                        |                                                      |
| Hypertension                                         | 1.22 (1.14, 1.32)                  | 1.19 (1.10, 1.28)                                      | 1.23 (1.14 , 1.32)                                   |
| Coronary Artery Disease                              | 1.09 (1.04, 1.14)                  | 1.04 (0.99, 1.09)                                      | 1.09 (1.04 , 1.15)                                   |
| Congestive Heart failure                             | 1.34 (1.26, 1.42)                  | 1.37 (1.29, 1.45)                                      | 1.33 (1.26 , 1.41)                                   |
| COPD                                                 | 0.90 (0.83, 0.99)                  | 0.90 (0.83, 0.98)                                      | 0.90 (0.83 , 0.98)                                   |
| Atrial Fibrillation                                  | 1.22 (1.14, 1.30)                  | 1.23 (1.15, 1.31)                                      | 1.22 (1.14 , 1.31)                                   |
| Carotid Disease                                      | 1.14 (1.09, 1.20)                  | 1.16 (1.10, 1.22)                                      | 1.14 (1.09 , 1.20)                                   |
| Depression                                           | 1.07 (1.01, 1.13)                  | 1.09 (1.03, 1.16)                                      | 1.07 (1.01 , 1.13)                                   |

|                               |                   |                   |                    |
|-------------------------------|-------------------|-------------------|--------------------|
| BMI (kg/m <sup>2</sup> )      |                   |                   |                    |
| Normal Weight (18.5-24.9)     | Ref.              | Ref               | Ref                |
| Underweight (<18.5)           | 1.67 (1.49, 1.87) | 1.72 (1.54, 1.92) | 1.67 (1.49 , 1.86) |
| Overweight (25.0-29.9)        | 0.70 (0.66, 0.74) | 0.70 (0.66, 0.74) | 0.70 (0.67 , 0.75) |
| Obese (30.0+)                 | 0.60 (0.57, 0.64) | 0.61 (0.58, 0.65) | 0.60 (0.57 , 0.64) |
| <i>Smoking</i>                |                   |                   |                    |
| Current                       | 1.26 (1.15, 1.38) | 1.22 (1.11, 1.33) | 1.25 (1.15 , 1.37) |
| Former                        | 1.01 (0.91, 1.11) | 0.98 (0.89, 1.09) | 1.00 (0.91 , 1.11) |
| Never                         | Ref.              | Ref               | Ref.               |
| Unknown                       | 1.05 (0.95, 1.12) | 1.03 (0.94, 1.14) | 1.04 (0.94 , 1.15) |
| Creatinine (1 mg/dL increase) | 1.02 (1.00, 1.04) | 1.03 (1.01, 1.04) | 1.01 (0.99 , 1.03) |
| <i>Medications</i>            |                   |                   |                    |
| Statin (Ref. = None)          | 0.81 (0.77, 0.85) | -                 | 0.81 (0.77 , 0.85) |
| Antiplatelets (Ref. = None)   | 0.91 (0.86, 0.96) | -                 | 0.91 (0.86 , 0.96) |
| Antiglycemics (Ref. = None)   |                   | -                 |                    |
| Oral                          | 0.91 (0.82, 1.00) | -                 | 0.90 (0.82 , 1.00) |
| Insulin                       | 1.46 (1.33, 1.61) | -                 | 1.46 (1.33 , 1.61) |
| Cilostazol (Ref. = No)        | 0.81 (0.74, 0.90) | -                 | 0.81 (0.73 , 0.90) |
| <i>CKD stage by eGFR</i>      |                   |                   |                    |
| None/Stage 1-2                | -                 | -                 | Ref.               |
| Stage 3                       | -                 | -                 | 0.91 (0.86 , 0.97) |
| Stage 4                       | -                 | -                 | 1.35 (1.19 , 1.52) |
| Stage 5/ESRD                  | -                 | -                 | 1.60 (1.46 , 1.76) |
|                               |                   |                   |                    |

Abbreviations: HR, hazard ratio; CI, confidence interval; ZCTA, zip code tabulation area; BMI, body mass index; CKD, chronic kidney disease; ESRD, end stage renal disease, COPD: Chronic obstructive pulmonary disease.
